# Supplementary material
Source: PubMed Central journal article supplement (PMC2527106)

*Supplement figure 1. The combination of carbachol and 8-pCPT-2'-Me-O-cAMP produces a synergic effect on amylase release.* Both 250  $\mu$ M 8-Br-cAMP and 250  $\mu$ M 8-pCPT-2'-Me-O-cAMP (CPT-Me-cAMP) weakly increased amylase release by 80 % whereas 10  $\mu$ M carbachol (CCh) increased it by 200 %. The co-stimulation with carbachol and either 8-Br-cAMP or CPT-Me-cAMP potentiated amylase release to 400 %. Data shown are means  $\pm$  SEM (4-6 experiments) of amylase release expressed as percentage of total. \*:  $p < 0.001$  vs Control; †:  $p < 0.001$  vs 8-Br-cAMP or CPT-Me-cAMP and ‡:  $p < 0.001$  vs carbachol.

*Supplement figure 2. Active Rap1 does not evoke either  $Ca^{2+}$  mobilization or cAMP generation in pancreatic acini.* Fresh pancreatic acini,  $\beta$ -Gal- (vector control) and Rap1GAP-overexpressing acini were stimulated with secretagogues and then either  $^{45}Ca^{2+}$  mobilization (A-B) or cAMP levels (C) was measured. CCK, but not VIP or 8-pCPT-2'-Me-O-cAMP, released  $Ca^{2+}$  from acini. The overexpression of Rap1GAP did not affect the CCK-evoked  $Ca^{2+}$  mobilization or VIP-induced cAMP increase. (A) Data shown are means  $\pm$  SEM (4-5 experiments) of  $^{45}Ca^{2+}$  remaining expressed as percentage of initial. □: Control, ▲: 300 pM CCK, ▼: 10 nM VIP and ■: 8-pCPT-2'-Me-O-cAMP. \*\*:  $p < 0.01$ , and \*\*\*:  $p < 0.001$  vs Control. (B) Data shown are means  $\pm$  SEM (4 experiments) of  $^{45}Ca^{2+}$  remaining expressed as percentage of initial. □:  $\beta$ -Gal-expressing cells without stimulation, ■: Rap1GAP-overexpressing cells without stimulation, Δ:  $\beta$ -Gal-expressing cells stimulated by 300 pM CCK, and ▲: Rap1GAP-overexpressing cells stimulated by 300 pM CCK. \*\*:  $p < 0.01$ , \*\*\*:  $p < 0.001$  vs  $\beta$ -Gal-expressing cells without stimulation. (C) Data shown are means  $\pm$  SEM (3 experiments) of cAMP levels expressed as pmol/mg protein. \*\*:  $p < 0.01$  vs  $\beta$ -Gal-expressing cells without stimulation (Control).

### Supplement figure 1

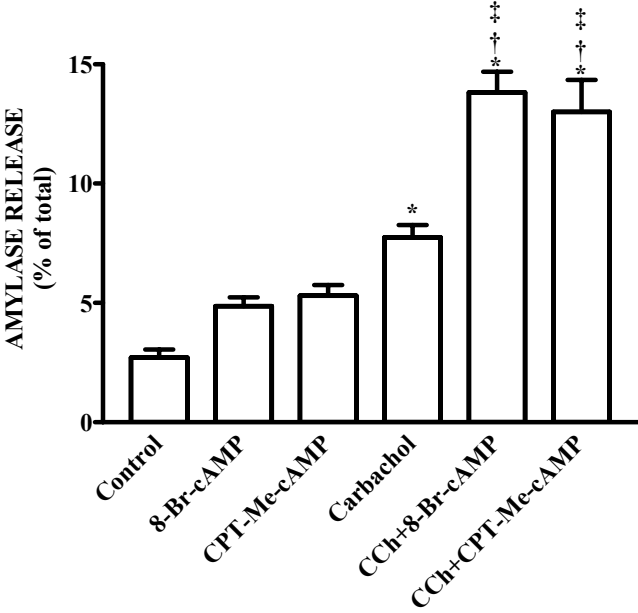

## Supplement figure 2

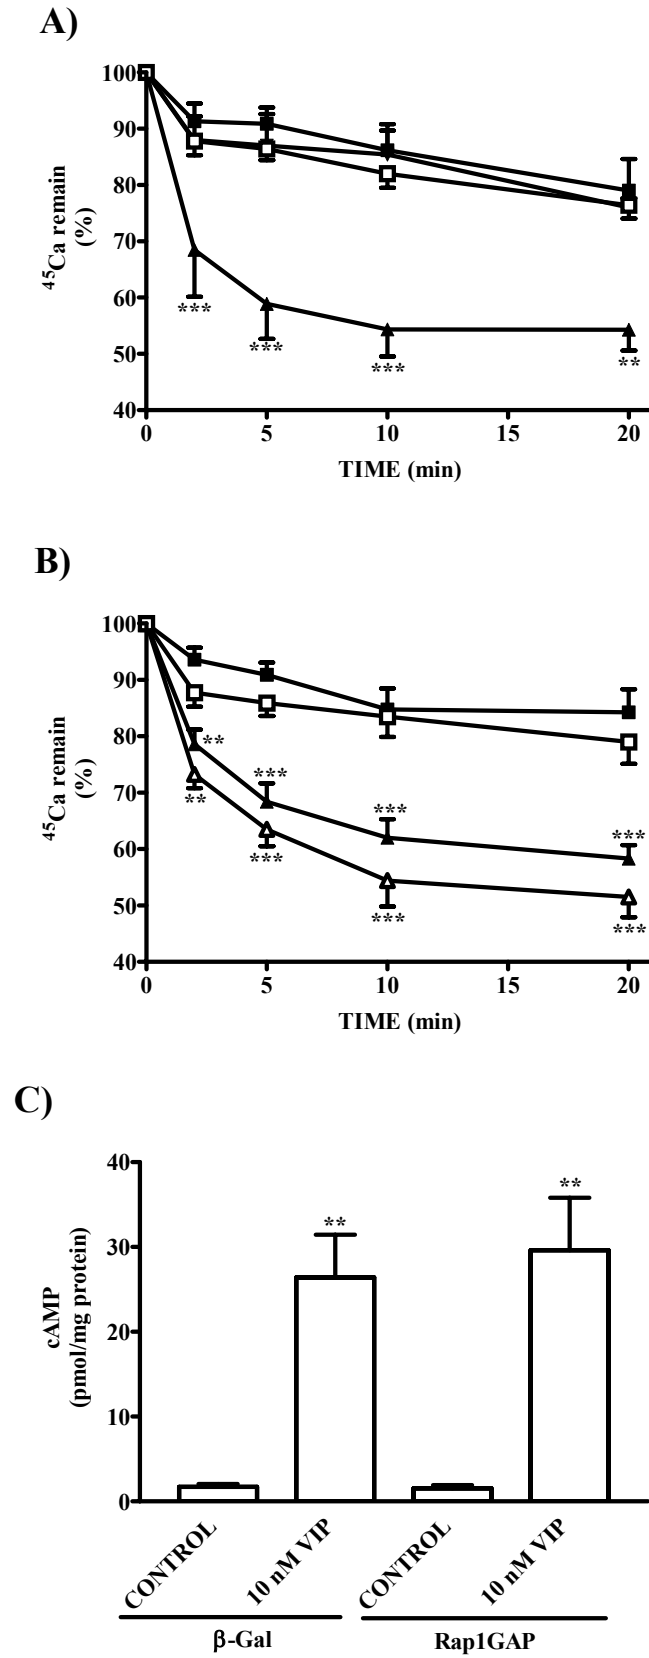

Supplement: supp_M800754200_Suppdata.pdf [file supp_M800754200_Suppdata.pdf]
